# Supplementary material for: Transmission of Influenza A in a Student Office Based on Realistic Person-to-Person Contact and Surface Touch Behaviour
Source: MDPI journal article supplement (doi:10.3390/ijerph15081699), 2018-08-09
Supplement: s1 [file s1]

## Supplementary Materials

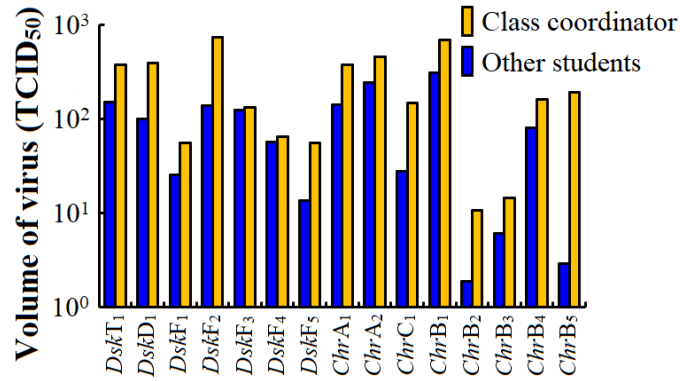

Figure S1. Surfaces contamination around the class coordinator and other students.

Table S1. Types of surfaces in student office.

| Primary surface           | Secondary surface | Code        | Sub-surface              | Code                     |
|---------------------------|-------------------|-------------|--------------------------|--------------------------|
| Students ( <i>Std</i> )   | Head              | <i>StdH</i> | Head                     | <i>StdH</i> <sub>1</sub> |
|                           |                   |             | Face                     | <i>StdH</i> <sub>2</sub> |
|                           |                   |             | Neck                     | <i>StdH</i> <sub>3</sub> |
|                           | Shoulder          | <i>StdS</i> | Left shoulder            | <i>StdS</i> <sub>1</sub> |
|                           |                   |             | Right shoulder           | <i>StdS</i> <sub>2</sub> |
|                           | Arm               | <i>StdA</i> | Left arm                 | <i>StdA</i> <sub>1</sub> |
|                           |                   |             | Right arm                | <i>StdA</i> <sub>2</sub> |
|                           | Hand              | <i>StdD</i> | Left hand                | <i>StdD</i> <sub>1</sub> |
|                           |                   |             | Right hand               | <i>StdD</i> <sub>2</sub> |
|                           | Body              | <i>StdB</i> | Front                    | <i>StdB</i> <sub>1</sub> |
| Back                      |                   |             | <i>StdB</i> <sub>2</sub> |                          |
|                           | Hip, leg, foot    | <i>StdL</i> | Hip & leg                | <i>StdL</i> <sub>1</sub> |
| Belongings ( <i>Bln</i> ) | Bag               | <i>BlnB</i> | Bag                      | <i>BlnB</i> <sub>1</sub> |
|                           | Cup               | <i>BlnC</i> | Cup                      | <i>BlnC</i> <sub>1</sub> |
|                           | Headphones        | <i>BlnE</i> | Headphones               | <i>BlnE</i> <sub>1</sub> |
|                           | Frame of glasses  | <i>BlnG</i> | Frame of glasses         | <i>BlnG</i> <sub>1</sub> |
|                           | Mobile phone      | <i>BlnM</i> | Mobile phone             | <i>BlnM</i> <sub>1</sub> |
|                           | Overcoat          | <i>BlnO</i> | Overcoat                 | <i>BlnO</i> <sub>1</sub> |
|                           | Pillow            | <i>BlnP</i> | Pillow                   | <i>BlnP</i> <sub>1</sub> |
| Computer ( <i>Cpt</i> )   | Mouse             | <i>CptM</i> | Mouse                    | <i>CptM</i> <sub>1</sub> |
|                           | Keyboard          | <i>CptK</i> | Keyboard                 | <i>CptK</i> <sub>1</sub> |
| Desk ( <i>Dsk</i> )       | Desktop           | <i>DskT</i> | Desktop                  | <i>DskT</i> <sub>1</sub> |
|                           |                   |             | Drawer                   | <i>DskD</i> <sub>1</sub> |
|                           | Fence             | <i>DskF</i> | Top of front fence       | <i>DskF</i> <sub>1</sub> |
|                           |                   |             | Top of left fence        | <i>DskF</i> <sub>2</sub> |
|                           |                   |             | Top of right fence       | <i>DskF</i> <sub>3</sub> |
|                           |                   |             | Side of left fence       | <i>DskF</i> <sub>4</sub> |
|                           |                   |             | Side of right fence      | <i>DskF</i> <sub>5</sub> |

|                           |             |                           |                          |                          |
|---------------------------|-------------|---------------------------|--------------------------|--------------------------|
| <b>Chair (Chr)</b>        | Arm         | <i>ChrA</i>               | Left chair arm           | <i>ChrA</i> <sub>1</sub> |
|                           |             |                           | Right chair arm          | <i>ChrA</i> <sub>2</sub> |
|                           | Cushion     | <i>ChrC</i>               | Cushion                  | <i>ChrC</i> <sub>1</sub> |
|                           | Seat back   | <i>ChrB</i>               | Top of seat back         | <i>ChrB</i> <sub>1</sub> |
|                           |             |                           | Back of seat back        | <i>ChrB</i> <sub>2</sub> |
|                           |             |                           | Front of seat back       | <i>ChrB</i> <sub>3</sub> |
|                           |             |                           | Left of seat back        | <i>ChrB</i> <sub>4</sub> |
|                           |             |                           | Right of seat back       | <i>ChrB</i> <sub>5</sub> |
|                           | Controller  | <i>PbfC</i>               | AC controller            | <i>PbfC</i> <sub>1</sub> |
|                           |             |                           | Light switch             | <i>PbfC</i> <sub>2</sub> |
| Printer                   | <i>PbfP</i> | Cover                     | <i>PbfP</i> <sub>1</sub> |                          |
|                           |             | Screen                    | <i>PbfP</i> <sub>2</sub> |                          |
|                           |             | Drawer                    | <i>PbfP</i> <sub>3</sub> |                          |
|                           |             | Body                      | <i>PbfP</i> <sub>4</sub> |                          |
|                           |             | Scanning surface          | <i>PbfP</i> <sub>5</sub> |                          |
| Door                      | <i>PbfD</i> | Handle                    | <i>PbfD</i> <sub>1</sub> |                          |
|                           |             | Side                      | <i>PbfD</i> <sub>2</sub> |                          |
|                           |             | Main surface              | <i>PbfD</i> <sub>3</sub> |                          |
| Window                    | <i>PbfO</i> | Handle                    | <i>PbfO</i> <sub>1</sub> |                          |
|                           |             | Frame                     | <i>PbfO</i> <sub>2</sub> |                          |
|                           |             | Glass                     | <i>PbfO</i> <sub>3</sub> |                          |
| Water dispenser           | <i>PbfW</i> | Body                      | <i>PbfW</i> <sub>1</sub> |                          |
|                           |             | Bucket                    | <i>PbfW</i> <sub>2</sub> |                          |
|                           |             | Button                    | <i>PbfW</i> <sub>3</sub> |                          |
| Tissue dispenser          | <i>PbfT</i> | Tissue dispenser          | <i>PbfT</i> <sub>1</sub> |                          |
| Trash can                 | <i>PbfR</i> | Trash can                 | <i>PbfR</i> <sub>1</sub> |                          |
| Cabinet handle            | <i>PbfB</i> | Cabinet handle            | <i>PbfB</i> <sub>1</sub> |                          |
| Desk beneath printer      | <i>PbfK</i> | Desk beneath printer      | <i>PbfK</i> <sub>1</sub> |                          |
| Chair in front of printer | <i>PbfH</i> | Chair in front of printer | <i>PbfH</i> <sub>1</sub> |                          |
